# Supplementary material for: Brain clusterin protein isoforms and mitochondrial localization
Source: PubMed Central journal article supplement (PMC6860991; doi:10.7554/elife.48255), 2019-11-18
Supplement: elife-48255-supp1.pdf [file elife-48255-supp1.pdf]

FINAL REPORT OF LABORATORY EXAMINATION

4011 Discovery Drive, Columbia, MO 65201

1-800-669-0825 1-573-499-5700

[idxxbioanalytics@idexx.com](mailto:idxxbioanalytics@idexx.com)

[www.idxxbioanalytics.com](http://www.idxxbioanalytics.com)

IDEXX BioAnalytics Case # 24482-2019

Client Case # 20190826

Submitted By

Liqin Zhao  
 University of Kansas  
 1251 Wescoe Hall Dr.  
 Lawrence, KS 66045

Phone: 785-864-4088  
 Email: lzha@ku.edu

Received: 8/27/2019

Completed: 8/28/2019

Specimen Description

Species: human/mouse  
 Description: Cells  
 Number of Specimens/Animals: 2

| ID | Client ID | Species |
|----|-----------|---------|
| 1  | N2a       | mouse   |
| 2  | SH-SY5Y   | human   |

**Services/Tests Performed:** CellCheck 9 - human (9 Marker STR Profile and Inter-species Contamination Test) (2);  
 CellCheck - mouse (mouse STR profile and interspecies contamination test) (1)

**Genetic evaluation for:** Human 9-Marker STR Profile, Interspecies Contamination Test, Interspecies Contamination Test, Mouse STR Profile

**Summary:** Cell Check results are provided in the data results section for each sample. For human samples, an identity matching score above 80% indicates the sample is consistent with the cell line of origin. For human samples with less than an 80% matching score, please see individual comments for these samples in the detail section. For all other species, please see individual detailed results.

Please see the report for details.

## CELL CHECK

### Species-specific PCR Evaluation

| Species              | 1 |
|----------------------|---|
| mouse                | + |
| rat                  | - |
| human                | - |
| Chinese hamster      | - |
| African green monkey | - |

### Marker Analysis

| Marker Name | 1                |                        |
|-------------|------------------|------------------------|
|             | Sample Results   | Neuro 2A (IBA Profile) |
| MCA-4-2     | 21.3, 22.3       | 21.3, 22.3             |
| MCA-5-5     | 15, 17           | 15, 17                 |
| MCA-6-4     | 18, 20           | 18, 20                 |
| MCA-6-7     | 12               | 12                     |
| MCA-9-2     | 15, 16           | 15, 16                 |
| MCA-12-1    | 16               | 16                     |
| MCA-15-3    | 21.3, 22.3, 23.3 | 21.3, 22.3, 23.3       |
| MCA-18-3    | 22               | 22                     |
| MCA-X-1     | 26, 27           | 26, 27                 |

| Sample ID | Remarks                                                                                                                                                                                                                                                                                                             |
|-----------|---------------------------------------------------------------------------------------------------------------------------------------------------------------------------------------------------------------------------------------------------------------------------------------------------------------------|
| 1         | <p>The sample was confirmed to be of mouse origin and no mammalian interspecies contamination was detected. A genetic profile was generated for the sample by using a panel of STR markers for genotyping.</p> <p>The sample profile matches identically to the genetic profile established for this cell line.</p> |

### Species-specific PCR Evaluation

| Species              | 2 |
|----------------------|---|
| mouse                | - |
| rat                  | - |
| human                | + |
| Chinese hamster      | - |
| African green monkey | - |

**Marker Analysis**

| Marker Name    | 2              |                          |
|----------------|----------------|--------------------------|
|                | Sample Results | SH-SY5Y (ATCC# CRL-2266) |
| AMEL           | X              | X                        |
| CSF1PO         | 11             | 11                       |
| D13S317        | 11             | 11                       |
| D16S539        | 8, 13          | 8, 13                    |
| D5S818         | 12             | 12                       |
| D7S820         | 7, 10          | 7, 10                    |
| TH01           | 7, 10          | 7, 10                    |
| TPOX           | 8, 11          | 8, 11                    |
| vWA            | 14, 18         | 14, 18                   |
| Identity Match | 100%           |                          |
